# Supplementary figures and images for: Pentraxin 3 regulates synaptic function by inducing AMPA receptor clustering via ECM remodeling and β1‐integrin
Source: PubMed Central journal article supplement — EMBO J. 2018 Nov 5;38(1):e99529. doi: 10.15252/embj.201899529 (PMC6315291; doi:10.15252/embj.201899529), 2018-11-05

# Related to Fig.4C

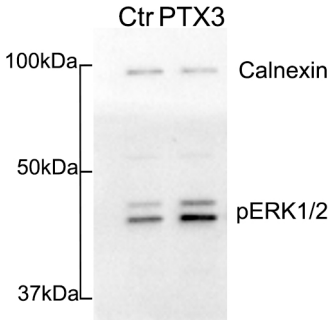

Supplement: EMBJ-38-e99529-s002.pdf [file EMBJ-38-e99529-s002.pdf]
